# Supplementary material for: Gentamicin compared with ceftriaxone for the treatment of gonorrhoea (G-ToG): a randomised non-inferiority trial
Source: PubMed Central journal article supplement — Lancet. 2019 Jun 22;393(10190):2511–20. doi: 10.1016/S0140-6736(18)32817-4 (PMC6620599; doi:10.1016/s0140-6736(18)32817-4), 2019-06-22
Supplement: mmc1.pdf [file mmc1.pdf]

# THE LANCET

## Supplementary appendix

This appendix formed part of the original submission and has been peer reviewed.  
We post it as supplied by the authors.

Supplement to: Ross JDC, Brittain C, Cole M, et al. Gentamicin compared with ceftriaxone for the treatment of gonorrhoea (G-ToG): a randomised non-inferiority trial. *Lancet* 2019; published online May 2. [http://dx.doi.org/10.1016/S0140-6736\(18\)32817-4](http://dx.doi.org/10.1016/S0140-6736(18)32817-4).

**Supplementary Table 1 Baseline characteristics of participants by treatment arm and by availability of primary outcome**

| Characteristic                                                                           | Ceftriaxone Group without primary outcome data (n =56) | Ceftriaxone Group with primary outcome data (n =306) | Gentamicin Group without primary outcome data (n =66) | Gentamicin Group with primary outcome data (n =292) |
|------------------------------------------------------------------------------------------|--------------------------------------------------------|------------------------------------------------------|-------------------------------------------------------|-----------------------------------------------------|
| <b>Age at randomisation (years)</b>                                                      |                                                        |                                                      |                                                       |                                                     |
| Mean(sd)                                                                                 | 28.6[8.9]                                              | 30.5[10.3]                                           | 27.8[8.7]                                             | 31.1[10.1]                                          |
| Min,max                                                                                  | 18.7,57.4                                              | 16.1,70.2                                            | 16.5,51.1                                             | 17.1,68.4                                           |
| <b>Gender</b>                                                                            |                                                        |                                                      |                                                       |                                                     |
| Male                                                                                     | 50(89%)                                                | 243(79%)                                             | 47(71%)                                               | 245(84%)                                            |
| <b>Ethnicity</b>                                                                         |                                                        |                                                      |                                                       |                                                     |
| White                                                                                    | 34(61%)                                                | 207(68%)                                             | 47(71%)                                               | 208(71%)                                            |
| Black                                                                                    | 11(20%)                                                | 42(14%)                                              | 9(14%)                                                | 39(13%)                                             |
| Asian                                                                                    | 5(9%)                                                  | 21(7%)                                               | 3(5%)                                                 | 15(5%)                                              |
| Mixed Race                                                                               | 4(7%)                                                  | 23(8%)                                               | 7(11%)                                                | 19(7%)                                              |
| Other                                                                                    | 2(4%)                                                  | 13(4%)                                               | 0                                                     | 11(4%)                                              |
| <b>Country of birth</b>                                                                  |                                                        |                                                      |                                                       |                                                     |
| UK                                                                                       | 38(68%)                                                | 220(72%)                                             | 51(77%)                                               | 202(69%)                                            |
| Other                                                                                    | 18(32%)                                                | 86(28%)                                              | 15(23%)                                               | 90(31%)                                             |
| <b>If Other, region</b>                                                                  |                                                        |                                                      |                                                       |                                                     |
| Europe(non UK)                                                                           | 4(7%)                                                  | 14(5%)                                               | 4(6%)                                                 | 10(3%)                                              |
| North America                                                                            | 1(2%)                                                  | 17(6%)                                               | 3(5%)                                                 | 11(4%)                                              |
| Asia Pacific                                                                             | 8(14%)                                                 | 43(14%)                                              | 5(8%)                                                 | 51(17%)                                             |
| Latin America                                                                            | 1(2%)                                                  | 6(2%)                                                | 1(2%)                                                 | 10(3%)                                              |
| Middle East                                                                              | 1(2%)                                                  | 1(<0.5%)                                             | 1(2%)                                                 | 4(1%)                                               |
| Africa                                                                                   | 3(5%)                                                  | 5(2%)                                                | 1(2%)                                                 | 4(1%)                                               |
| <b>Creatinine level (µmol)</b>                                                           |                                                        |                                                      |                                                       |                                                     |
| Mean(sd)                                                                                 | 78.6[18]                                               | 78.6[14.9]                                           | 74.2[13]                                              | 79.1[16.2]                                          |
| Min,max                                                                                  | 42,124                                                 | 45,137                                               | 51,104                                                | 26,154                                              |
| N                                                                                        | 51                                                     | 292                                                  | 52                                                    | 280                                                 |
| <b>eGFR</b>                                                                              |                                                        |                                                      |                                                       |                                                     |
| Mean(sd)                                                                                 | 113.8[20.6]                                            | 110.1[17.8]                                          | 117.2[13.9]                                           | 110.5[18.2]                                         |
| Min,max                                                                                  | 62.3,150.4                                             | 56.3,179                                             | 87.1,149.6                                            | 52.4,157.7                                          |
| N                                                                                        | 51                                                     | 290                                                  | 51                                                    | 277                                                 |
| <b>Medical history</b>                                                                   |                                                        |                                                      |                                                       |                                                     |
| Diabetes                                                                                 | 0                                                      | 3(1%)                                                | 0                                                     | 1(<0.5%)                                            |
| Otitis media                                                                             | 0                                                      | 9(3%)                                                | 1(2%)                                                 | 6(2%)                                               |
| Renal disease                                                                            | 0                                                      | 3(1%)                                                | 1(2%)                                                 | 3(1%)                                               |
| Liver disease                                                                            | 1(2%)                                                  | 7(2%)                                                | 2(3%)                                                 | 3(1%)                                               |
| <b>HIV positive (participant reported)</b>                                               |                                                        |                                                      |                                                       |                                                     |
| Positive                                                                                 | 7(13%)                                                 | 46(15%)                                              | 4(6%)                                                 | 39(13%)                                             |
| Unknown                                                                                  | 5(9%)                                                  | 5(2%)                                                | 1(1%)                                                 | 7(2%)                                               |
| <b>Sites<sup>^</sup></b>                                                                 |                                                        |                                                      |                                                       |                                                     |
| Genital                                                                                  | 36(64%)                                                | 154(50%)                                             | 45(68%)                                               | 174(60%)                                            |
| Pharyngeal                                                                               | 15(27%)                                                | 113(37%)                                             | 26(39%)                                               | 102(35%)                                            |
| Rectal                                                                                   | 22(39%)                                                | 137(45%)                                             | 28(42%)                                               | 119(41%)                                            |
| <b>Number of sites infected<sup>^</sup></b>                                              |                                                        |                                                      |                                                       |                                                     |
| One                                                                                      | 31(55%)                                                | 158(52%)                                             | 26(39%)                                               | 154(53%)                                            |
| Two                                                                                      | 12(21%)                                                | 84(27%)                                              | 14(21%)                                               | 80(27%)                                             |
| Three                                                                                    | 6(11%)                                                 | 26(8%)                                               | 15(23%)                                               | 27(9%)                                              |
| <b>Positive diagnosis at baseline visit<sup>^</sup></b>                                  | 49(88%)                                                | 268(88%)                                             | (83%)                                                 | 261(89%)                                            |
| <b>Diagnosis of <i>N. gonorrhoeae</i> using gram stain at baseline visit</b>             | 29(52%)                                                | 110(36%)                                             | 33(50%)                                               | 133(46%)                                            |
| <b>Diagnosis of <i>N. gonorrhoeae</i> using Aptima Combo NAAT test at baseline visit</b> | 47(84%)                                                | 261(85%)                                             | 51(77%)                                               | 258(88%)                                            |

All data are N (%) unless otherwise indicated.

<sup>^</sup>Positive using tests from either NAAT or gram stain; participants may have had an infection at more than one site.

Medical history based on the participant ever having had that condition.

**Supplementary Table 2 Sexual behaviour during follow up for all participants**

|                                                                | <b>Ceftriaxone Group<br/>(n = 320)</b> | <b>Gentamicin Group<br/>(n = 302)</b> |
|----------------------------------------------------------------|----------------------------------------|---------------------------------------|
| <b>Sexual contact since receiving treatment for gonorrhoea</b> |                                        |                                       |
| No                                                             | 202(63%)                               | 198(66%)                              |
| Yes                                                            | 118(37%)                               | 104(34%)                              |
| <b>Use of condoms since receiving treatment for gonorrhoea</b> |                                        |                                       |
| No                                                             | 47(40%)                                | 47(45%)                               |
| Yes partially                                                  | 11(9%)                                 | 13(13%)                               |
| Yes consistently including for oral sex                        | 18(15%)                                | 9(9%)                                 |
| Yes consistently but not for oral sex                          | 42(36%)                                | 35(34%)                               |

**Supplementary Table 3 Summary of protocol deviations in the trial**

|                                                                                | <b>Ceftriaxone Group<br/>(n = 362)</b> | <b>Gentamicin Group<br/>(n = 358)</b> |
|--------------------------------------------------------------------------------|----------------------------------------|---------------------------------------|
| <b>Number of participants with at least one deviation</b>                      | 121(33%)                               | 124(35%)                              |
| <b>Total number of deviations</b>                                              | 166                                    | 167                                   |
| <b>Total number of participants with at least one major protocol deviation</b> | 7(2%)                                  | 18(5%)                                |
| Did not receive treatment as randomised                                        | 4(1%)                                  | 10(3%)                                |
| Did not fulfil eligibility criteria                                            | 5(1%)                                  | 13(4%)                                |
